# Supplementary material for: Growth-Phase-Specific Modulation of Cell Morphology and Gene Expression by an Archaeal Histone Protein
Source: PubMed Central journal article supplement — mBio. 2015 Sep 8;6(5):e00649-15. doi: 10.1128/mBio.00649-15 (PMC4600100; doi:10.1128/mbio.00649-15), 2015-09-08
Supplement: mbo004152454sf2.pdf [file mbo004152454sf2.pdf]

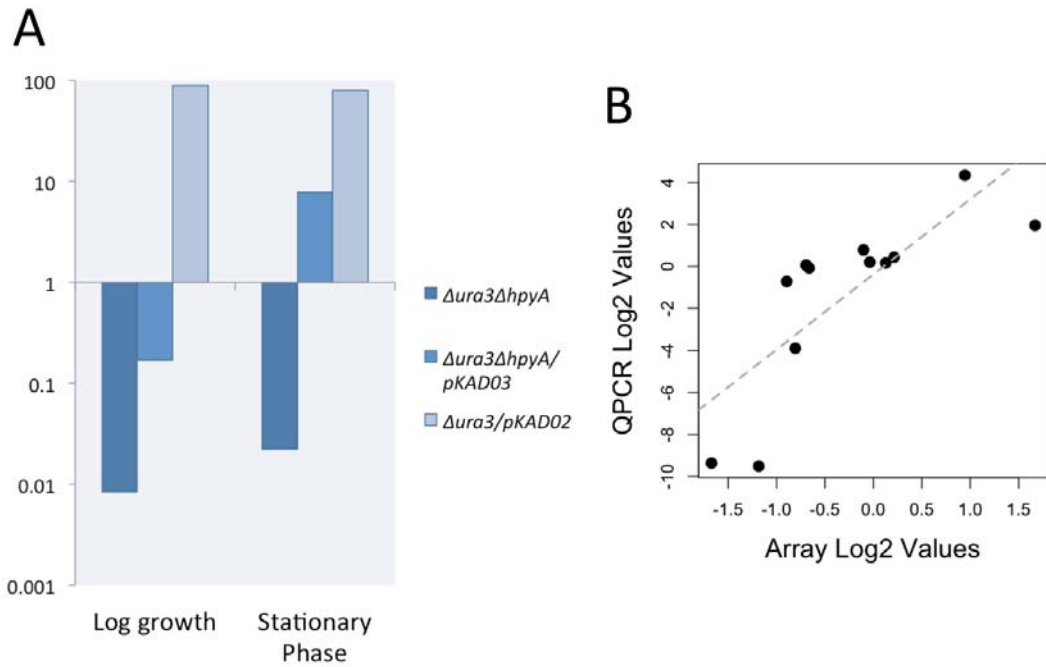

**Supplementary Figure S2: qPCR verification of strains and array data.** A) Using primers for *VNG0134G*, histone mutant gene expression dosage was verified *via* RT-qPCR.  $\Delta\Delta Ct$  was calculated for each strain relevant to the parent control and the reference locus *VNG1756G*. Shown here are the knock-out ( $\Delta ura3\Delta hpyA$ ), the histone mutant rescue strain ( $\Delta ura3\Delta hpyA/pKAD03$ ), and the overexpression strain ( $\Delta ura3/pKAD02$ ) ratios. B) Knock-out array data was verified using RT-qPCR of array mRNA samples. The following loci were tested in both logarithmic and stationary phase samples: *VNG1123G*, *VNG1317H*, *VNG1641H*, *VNG1815G*, *VNG5019G*, and *VNG5192H*. Pearson correlation between the two datasets = 0.79. The equation of the line of best fit:  $y = 3.5763x - 0.3758$ . Detailed methods are described in the Supplementary Text. Primers used are listed in Supplementary Table S5.
