# Supplementary material for: Growth-Phase-Specific Modulation of Cell Morphology and Gene Expression by an Archaeal Histone Protein
Source: PubMed Central journal article supplement — mBio. 2015 Sep 8;6(5):e00649-15. doi: 10.1128/mBio.00649-15 (PMC4600100; doi:10.1128/mbio.00649-15), 2015-09-08
Supplement: mbo004152454sf3.pdf [file mbo004152454sf3.pdf]

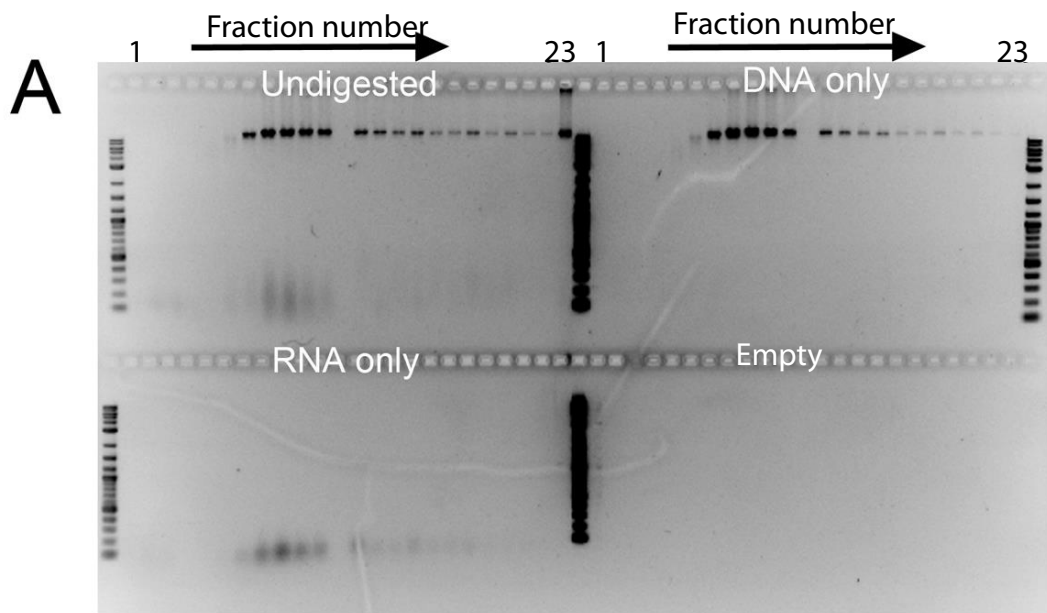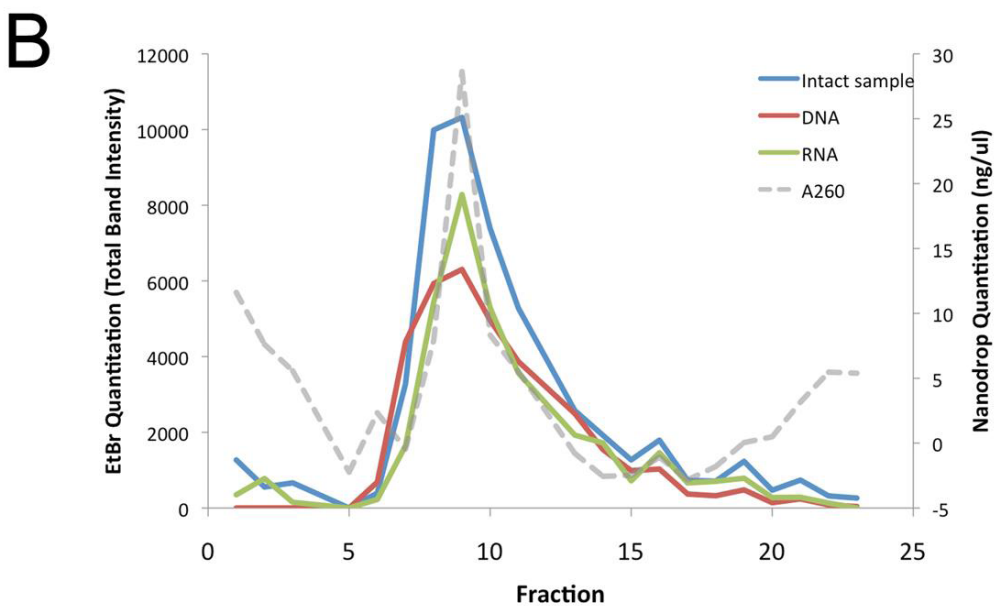

Supplementary Figure S3. Detection of nucleic acids in sucrose gradient fractions. A) Agarose gel and ethidium bromide (EtBr) staining of nucleic acids from fractions 1-23. Top left: mock digested samples, top right: RNase A digested samples representing DNA content, bottom left: micrococcal nuclease (MNase) digested samples representing RNA content. B) Image J quantitation of all three treatments from (A) compared to nucleic acid concentration as determined by absorbance at 260 nm (A260; dotted gray line).

See Supplementary Text for methods and results.
